# Supplementary material for: Effects of Water Deuteration on Thermodynamic and Structural Properties of Proteins and Biomembranes
Source: PubMed Central journal article supplement (PMC10017026; doi:10.1021/acs.jpcb.2c08270), 2023-02-01
Supplement: jp2c08270_si_001.pdf [file jp2c08270_si_001.pdf]

# **Supporting Information: Effects of Water Deuteration on Thermodynamic and Structural Properties of Proteins and Biomembranes**

Carmelo Tempra, Victor Cruces Chamorro, and Pavel Jungwirth\*

*Institute of Organic Chemistry and Biochemistry of the Czech Academy of Sciences,  
Flemingovo nám. 542/2, 160 00 Prague 6, Czech Republic*

E-mail: [pavel.jungwirth@uochb.cas.cz](mailto:pavel.jungwirth@uochb.cas.cz)

## Free energy of transfer from $H_2O$ to $D_2O$

| aa   | $\Delta G(Kcal/mol)$ | Error ( $Kcal/mol$ ) |
|------|----------------------|----------------------|
| Ala  | 0.942                | 0.011                |
| Asn  | 1.240                | 0.010                |
| Val  | 1.320                | 0.009                |
| Cys  | 1.330                | 0.018                |
| Gln  | 1.632                | 0.010                |
| Gly  | 0.771                | 0.018                |
| Ile  | 1.385                | 0.012                |
| Leu  | 1.456                | 0.011                |
| Met  | 1.651                | 0.015                |
| Phe  | 1.805                | 0.012                |
| Pro  | 1.392                | 0.013                |
| Ser  | 1.136                | 0.010                |
| Thr  | 1.425                | 0.014                |
| Trp  | 2.245                | 0.014                |
| Tyr  | 2.042                | 0.014                |
| His  | 1.464                | 0.011                |
| HisH | 2.082                | 0.012                |
| Arg  | 1.947                | 0.009                |
| Lys  | 1.806                | 0.010                |
| Asp  | 1.226                | 0.009                |
| Glu  | 1.665                | 0.013                |

**Table S1:** Free energy of transfer of each single amino acid from  $H_2O$  to  $D_2O$ , calculated using PMF and WHAM.

# Solvent Accessible Surface Area (SASA)

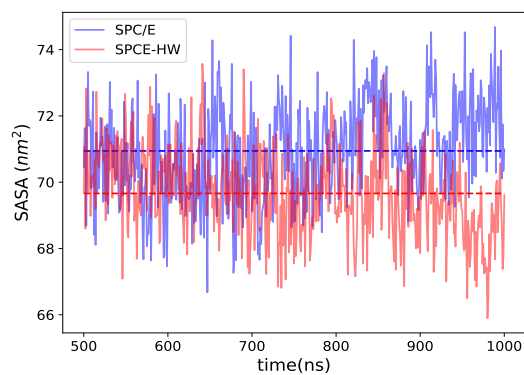

(A)

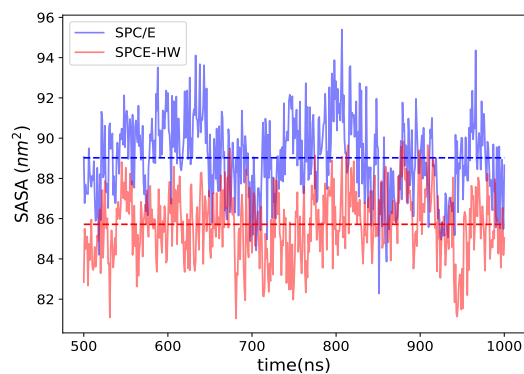

(B)

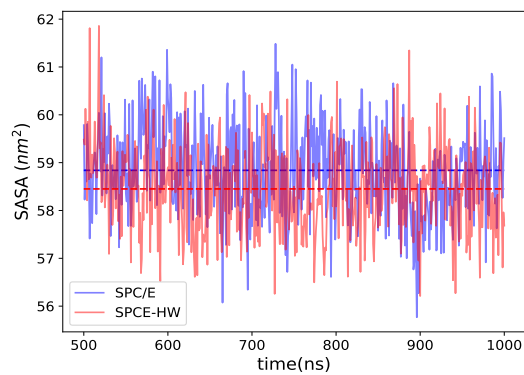

(C)

Figure S1: SASA of azurine (A), lactoglobuline (B) and ribonuclease (C) in SPC/E ( $H_2O$ , blue line) and SPCE-HW ( $D_2O$ , red line). The dashed lines represent average values over the production runs of 500 ns.

# Annealing of ribonuclease T1

| T(K) | % Structured |
|------|--------------|
| 278  | 0.59         |
| 298  | 0.59         |
| 318  | 0.59         |
| 338  | 0.59         |
| 358  | 0.59         |
| 398  | 0.52         |
| 418  | 0.49         |
| 438  | 0.26         |
| 448  | 0.24         |
| 458  | 0.20         |
| 468  | 0.21         |
| 478  | 0.20         |
| 488  | 0.20         |
| 498  | 0.19         |

Table S2: Percentage of structured protein (calculated with DSSP algorithm), for ribonuclease T1 in  $H_2O$

| T(K) | % Structured |
|------|--------------|
| 300  | 0.59         |
| 350  | 0.61         |
| 380  | 0.59         |
| 400  | 0.57         |
| 420  | 0.51         |
| 440  | 0.44         |
| 460  | 0.29         |
| 480  | 0.26         |
| 500  | 0.24         |

Table S3: Percentage of structured protein (calculated with DSSP algorithm), for ribonuclease T1 in  $D_2O$

# POPC membrane

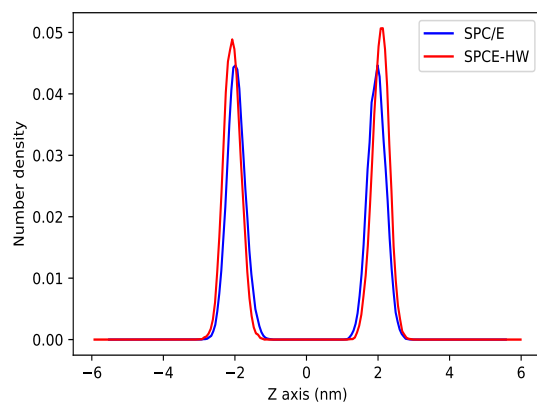

Figure S2: Phosphate density profile in SPC/E ( $H_2O$ , blue line) and SPCE-HW ( $D_2O$ , red line).
